# Supplementary material for: Grass Carp Prolactin Gene: Structural Characterization and Signal Transduction for PACAP-induced Prolactin Promoter Activity
Source: PubMed Central journal article supplement (PMC5854708; doi:10.1038/s41598-018-23092-0), 2018-03-15
Supplement: 41598_2018_23092_MOESM1_ESM.pdf [file 41598_2018_23092_MOESM1_ESM.pdf]

# **Grass Carp Prolactin Gene: Structural Characterization and Signal Transduction for PACAP-induced Prolactin Promoter Activity**

Chengyuan Lin <sup>a,b,c # \*</sup>, Jin Bai <sup>a #</sup>, Mulan He <sup>a</sup>, Anderson O. L. Wong <sup>a \*</sup>

<sup>a</sup> School of Biological Sciences, University of Hong Kong, Hong Kong.

<sup>b</sup> Clinical Division, School of Chinese Medicine, Hong Kong Baptist University, Hong Kong.

<sup>c</sup> YMU-HKBU Joint Laboratory of Traditional Natural Medicine, Yunnan Minzu University, China.

1 aagcagaaagcaagattcaagcaagacgagaataaagaaccagttaaaatg**P1-F**  
ATGGCTGAAGGA  
**M A E G**

66 TCTAGACTATACTTTGCAGgtaagcaaaccttatcttcctcagtctaaccttttcccgccacatt  
**S R L Y F A**

131 tttagactttatctctattaccttggttacatcccctttcggttccccattttcagttcatgctta

196 cttgatttcagctccctctatctgcctttcttcttttaccatactcctaataatgacattactgttta

261 actgttcctttttgtcctttgcttttcagTGACCGTCTGA**P1-R**  
TGTGTGCGTTTGTCTCAATCAACGG  
**V T V L M C A F V S I N G**

326 TGTCGGTCTGAATGATTTACTGGAAAGAGCCTCTCAACTT**P2-F**  
TCAGACAAACTTCACTCCCTCAGCA  
**V G L N D L L E R A S Q L S D K L H S L S**

391 CCTCTCTACCAATGACCTGgtcagtactaaacaccctctaaaaaaaaaattgtgtgagtgtatg  
**T S L T N D L**

456 tgttgttacaataacgttgactatgatgatggaagaacccaaagcaggtttattaagttagtt

521 taaaagtatgagaatgtatccagatcaaacaggtaagtaataatggcagagcagtatcacagtcga

586 gtccttggatgatagtaaacactcactatacatgaacacacgaggaaaggacaaacgaagagatga

651 caatgctggagtggaatggaacaggacgatggaccaggaacaggcaagtagtctttcaggttgg

716 attcacaggatggtgagtcgtaatcattggtttacagtgagtgcttttatagggtattgatgag

781 actgtgataggatcatgcattgacagacctgagtagagtcggtgcgattgaggatgatggcagaa

846 gcggaaagagcccgggtggagccagaggggtggtggatcgaggcacagcaggagatccacaagtcc

911 aaagcgggtgccagagcaatgactgaccatggtggagcagagggagtcgggggccaaggtggagtc

976 ggtgggtctgagggccgagg**P3-F**  
tgaagtccagggctcagaggcttgaggtgaaaccaggggatcctc

1041 atataaaaggtggagctgcaacttgaaatccaaggcgaatccgagcagcaggggcagaaacacag

1106 gaggagtcaaggggctgaagggagacagccgaggtgaggcagaggagctggatggcttaggcaga

1171 ggagggagaggaagctgggtgggacaatcctcaatgaagaacacttgagctgggcagagccaa

1236 tggcaataaaggagacttgaggctgacagcggcaatgaaagagcttggaaagctggatgggaccac

1301 tgggtcatacagacagctggaaggcaccagcagaggaggaggtcaaggacaggaacaaaggtgg

1366 gaactggctcagtgatccaggctcagtaagccactccagtcactccaactcccaatattcca

1431 cttggacgaatgtggggaccggcccactcacctggacagactcggctttctctgggtttgaggca

1496 agcattggctcaggctctgtagcaaaattgctgggtggagggcgtttgggattggaagaggggg

1561 cttggagatgactagaggagatactcgaactggggagatggactggtgggtctgctcctccacta

1626 tcccactgtgttgaagatccataaacccacaggtgtaattgatgaagtcacaaggaacta

1691 taaccctcattcaacagtaacatctggccgaggatctcatccatctcactccacaaagatgtact  
1756 gtacttaagagcctcatcctagcagcactcataatagatctcaaggaaatcctccacatagtctt  
1821 ccagagggcgccatattgggtgagggtgagcagggactcatcagtgacagagagtaaaatcagg  
1886 gagtgaaaaatggtgggtgctgctgggttcacagtggtggtaggtctggccatctgtaacat  
1951 tgacgcagacaatggatgatggaaagaacccaaagcaggtttattaagacacaggtgagcatac  
2016 aggtaagacaatggatccagatcaaacaggtaagtaataatggtaatggcaagcagagcaatata  
2081 caatagagtctttggatgatagttacactcactatacagtagtgatattatgtatgacactgaag  
2146 ctttgaagcacgtattgagcgcgcagcacaatctccagtgaagaccttgacgtgtagacttatt  
2211 tgtgcacataacatgaatccatztatatagtggtggctgcttcatccgacagaactttttctac  
2276 aagcttttagctgctttatttttactaaccaccagatggccctgttttcaacactctagaagct  
2341 ttgagtctgagctttgggaaagcctcagtgctttatgagcctttatttcccatccctactata  
2406 gaggaacacacaaagagagggcaaatgagcagatgacaatgctggaattgaagacaatggcaaac  
2471 aaggaaaataatatttcagcttggtatcctgtggtcataatgataaccagacaatgagttaaatg  
2536 agtgaatgtcttttatatgttattgatgggactgtgatagaatccatgtgtgcttgatgaaagca  
2601 ggtgagaatcgtgagggatgctaggtaatgtagtttgtgagtgagagtgacagcaagtgaggcaga  
2666 gtccagtatgtgtgtgagagttgcatgcccactgggttatttttgacttcagttttatccaaata  
2731 tgtattttttcatgaataagtttggtttgacattaacctctcaaccacagGATTCTCACTTTCCT  
2796 CCTGTTGGGAGGGTAATGATGCCCCGTCGGTCGATGTGCCACACATCCTCCCTTCAAATTCCTCA  
*P V G R V M M P R P S M C H T S S L Q I P N*  
2861 TGACAAAGACCAAGCCCTGAAAGTGCCGgtaagaacacactttactgcatccatcttctctttt  
*D K D Q A L K V P*  
2926 taaaatgtaaaaatactttctcctattccagctaaaataaatatataattttttaattacaa  
2991 atagctattagacattatgcagcataaaataaatatattttaatttaattgtaattactaaattt  
3056 atactttaatttatataacatataaaacaaactatataacataaaacaaactatacaaaaacata  
3121 ataaatataataaccataatttaaaaaagacattttatgtccctcctttgaaagtcacccaaaaac  
3186 aggtctcttcaaaaagttcttaagagatcataaaagaaatccatatgaatcaagtttaactaa  
3251 gtcttctgaagagacacaatcgcttcacatgatgaagagattttaatttaggattttattcacat  
3316 ataaacattgatcaaagtgcatcactgagcacattaaccctctggtattattcatttggcagtag  
3381 ttttttttggttcagtaaaatcaatgtaatatatttttggttcaataataactttttattttgatt

3446 ttgagagtatttaataattcatatattatacaattttgatcaataatgatgatgtttttactattg  
3511 aaatTTTTTCTTTCCAATTAAGCAGTATTTcattttaaagaagagagacaatgcctttaa  
3576 atccaatgggtctatcttgcaactcgatatttttagagtgtcacccagccttactgctgtgtgct  
3641 tttttccctaaatcgtcacaaaatgctctatatttttgctatttcccattaatttcctacaccg  
3706 gtcatttttgagcgaacaacaagtgtgactatttctttacaaccattaagctttttcaaataaa  
3771 gtcaccatttttttggtgtgtgtgggtcacatagcgactgctgcaaaagttttcataccatcccaa  
3836 tgaagtagcgatTTTTTAAATTTCAAAATGTTTTTTTTTTTTTTTTTGGTCTAAATGACCAAAC  
3901 aacaccagaggggtaattatggttacatgtaggctcagctgtagactacttgcttgaacaaacctc  
3966 actggttcttccagaaaatgcaaagtgacatggttatctaatttgtttctgcagGAGGATGAGTTG  
E D E L  
4031 CTTTCTTTGGCTCGGTCTCTGCTCCTGGCGTGGTCCGATCCCCTCGCCCTCCTCTCTGAGGC  
L S L A R S L L L A W S D P L A L L S S E A  
4096 GTCCAGCCTGGCACATCCAGAACGCAACACCATTAATAGCAAGACCAAAGAACTGCAAGAAAACA P5-R  
S S L A H P E R N T I N S K T K E L Q E N  
4161 TCAACAGCCTGGGTGCAGGTCTGGAGCATGTCGTTTACAAAGgtgagtgcgcttttagaacagct  
I N S L G A G L E H V V H K  
4226 ggaatggtgattgcaagagggcaaatatgaagtaaaccctaataatgatttttggatataaacataaag  
4291 aaatctaacgtacacctgtaagcaggggtatattatacgttgtccctttctctctctctacagA  
4356 TGGGCTCATCCTCAGACAACCTGTCCTCTCTCCCTTTTTACAGCAACAGCCTTGGCCAGGATAAA  
M G S S S D N L S S L P F Y S N S L G Q D K  
4421 ACCTCTCGACTTGTCAATTTCCATTTTCTGTTGTCTGCTTCCGCAGGGACTCCCACAAAATTGA  
T S R L V N F H F L L S C F R R D S H K I D  
4486 CAGTTTCTCAAAGTTCGCGCTGCCGGGCAGCCAAGAAGAGACCTGAGATGTGCTAGAGTGAAA  
S F L K V L R C R A A K K R P E M C \* P4-R  
4551 ATGCTACTCTGCTTCTCTCATTGTGGATGTTAAGTTAAAATGGCAGAGCAGTGTGATTTGAAA  
4616 TGTTTCTTTATAATACCGCATGGCAAAAATATGCCCTTATTGTTTCAAAGATGTAGATATTTGAT  
4681 TCACTTCTTATATATTTGAATAAATAACTGGACCAACGGGCCATATTACTCTGTCCCAGAGGT  
4746 AAAAGACAACAAAAGTAAACAAAAGTATTTCAATTAAATTTTAAAATTGAAGGTCTGCATGCAG  
4811 TCATACATGATGAATAAGTGCACAGAGTATATTTAAAATGTTTGACCATGCTCAGTTTGATAAGAC  
4876 ATTTGTATAGTAAGTATTTATTAAGAAACGATGTTGGATCTTTAACACGTTTATTTTAACATTAT  
4941 CTTCTGAAATGCAATATTTAAAGCTTTGCACCAATGTCAATAAATTTCTATCAAGCAAATTTAAA

**Supplementary Figure 1. Nucleotide sequence of the grass carp PRL gene (excluding 5' promoter).** Introns are indicated in lower cases, and exons are shown in capital letters. Amino acids deduced from the coding region are shown in italic single letter codon, and the stop codon is indicated by “\*”. Nucleotide numbering is defined with respect to the transcription start site deduced by primer extension. The primers using for the cloning and sequencing were underlined and marked in red color. P(n)-F represent the forward primers, and P(n)-R represent the reverse primers using the reverse and complementary sequence of the marked nucleotides.

-1188 TTTGAATAAACAGTCAATTAATGTTACTGGAAGAACATTTGTTTCATAACTTGAACAAACCTTCTGAG

-1121 AACATTCCTGTAGCTGGGTTGACATTTTGCATTAAAAGGAGGGCAACTAGTAAAAGAGCTTGCTC  
Pit I

-1054 TCAGCAAATATCCAAC<sup>T</sup>GAATTTAGGGTGTGTGTGTGTGTGTGTGCGTGTGTGCGTGTGTGTGGTT  
Sp I

-987 CAGACATACCTACGTTATGGGGACAAATTGTCCCCAAAAATATCTGAAATCATTGTCCTTGTAGGG  
GR Pit I

-920 ACATTTTTTTGTCCCCATGAGGAAAACAGCTTATAAATCAATCATAACAATGTGATGTTTTTTGAAA  
AP-2

-853 ATGCAGAAAGTTTTGTAAATGGGTAGGGTAAAGGGATGGAATATACAGTATAAAAAGCATTATGTCT  
C/EBPbeta Sp 1 Pit I

-786 ATGGAATGTCCCCATAAAACATGAAAAATTTGTGTGTGTGTGCATTTTTCTGAACGGATTGTACAC  
NF-kappaB Pit 1

-719 AGGAGCAAGGGGGTAAACAGAAGAATTTCCCCACACAGACGTGAAAAATGTCCAGCTCTTAGAGCA

-652 GACCACCAGAGATAAATCAGAACCTGAAGAAGGCATAGAAGGGAAAGTTTCATAACAATGGGTTAAC  
GTAT 1

-585 CAGTGCATCAGAAATAATAAAAAAGAAAACAAAAGGCATAAAAGCTCTCAGTCCACAGCAGGACAT  
Hb AP-4

-518 GACAAATGAGTGTTCCTTTATGGGGGAAGGCTGTGCATGTGTAGACTTTCTTTAAATGGCAGCTG  
Sp 1 E12

-451 GCTGCAAGACTGTGTGAAGTGTACCTTCATAGTGGTGCAGTCTATGAAAATTTGTTTCATTTTTCCAT  
AP 1 Pit I

-384 TTTTTCTCCATTTAGATATCTAAAGATCTAAAGTAATCGTATCACACTAAACACACATTTTTTTT  
HNF-3B

-317 AAACACAAAAACACAGATAAACCAAATGCTCCTTTTCACTTTTAAATAAGCTCTATAAATCAGAAGTTT  
GTAT 1 TBP HSF

-250 CTCCATCCAGTAATTGAAAGAGTGGCTTTGCATTTATTATTTGGCACTTCATGTGACTGATGGTGAA  
Oct 1 C/EBPalpha Pit 1 Hb

-183 TTTTGCCCCACTGTGTCTGTATCTACTCAAACAGCTTATCAATATTGATTAACCAAACCTCTCAA  
HNF-4alpha1 GTAT 1 AP1

-116 ACAATGTTTTTCATTAGTTTCAGGATTGAACTAGTTTCAATACACCTGGAGTGTAAAGACTTACTGCA  
Pit 1 C/EBPalpha

-49 TATCCAAATGAAAGAAGTAGGGCTATATAATGAAAAGCTCAAGAGAGGA | aagca.....  
| +1

**Supplementary Figure 2. Nucleotide sequence of the 5' promoter region of grass carp PRL gene.** Nucleotide numbering was defined with respect to the transcription start site deduced by primer extension. In the 5' promoter region, the putative cis-acting elements predicted with TESS site search (<http://www.cbil.upenn.edu/teess/>) are underlined. The possible TATA box is indicated by red letters. The 5' region of 5' UTR of grass carp gene (start with "+1") is shown in lower cases for reference.

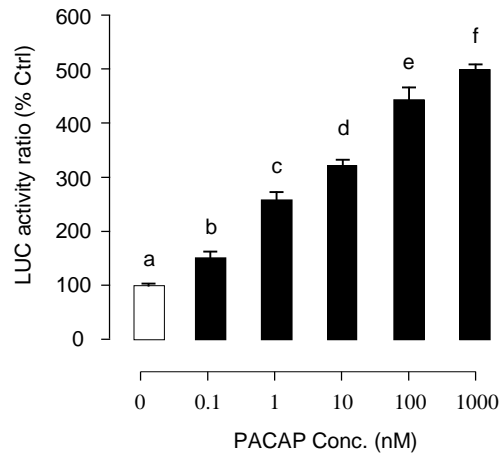

**Supplementary Figure 3. Effect of grass carp PACAP38 on PRL promoter activity in  $\alpha$ T3-1 Cells.**  $\alpha$ T3-1 Cells were transiently transfected with pPRL(-1156).LUC for 6 h by using lipofectamine. After 18 h recovery, the cells were incubated with grass carp PACAP38 dose-dependently. After drug treatment, cell lysate was prepared for dual-luciferase measurement. Data are presented as percentage of control by converting the ratio of firefly and renilla luciferase in the same sample. The results are expressed as mean  $\pm$  SEM (n = 4) and different letters denote a significant difference at  $p < 0.05$  (ANOVA followed by Fisher's LSD Test).

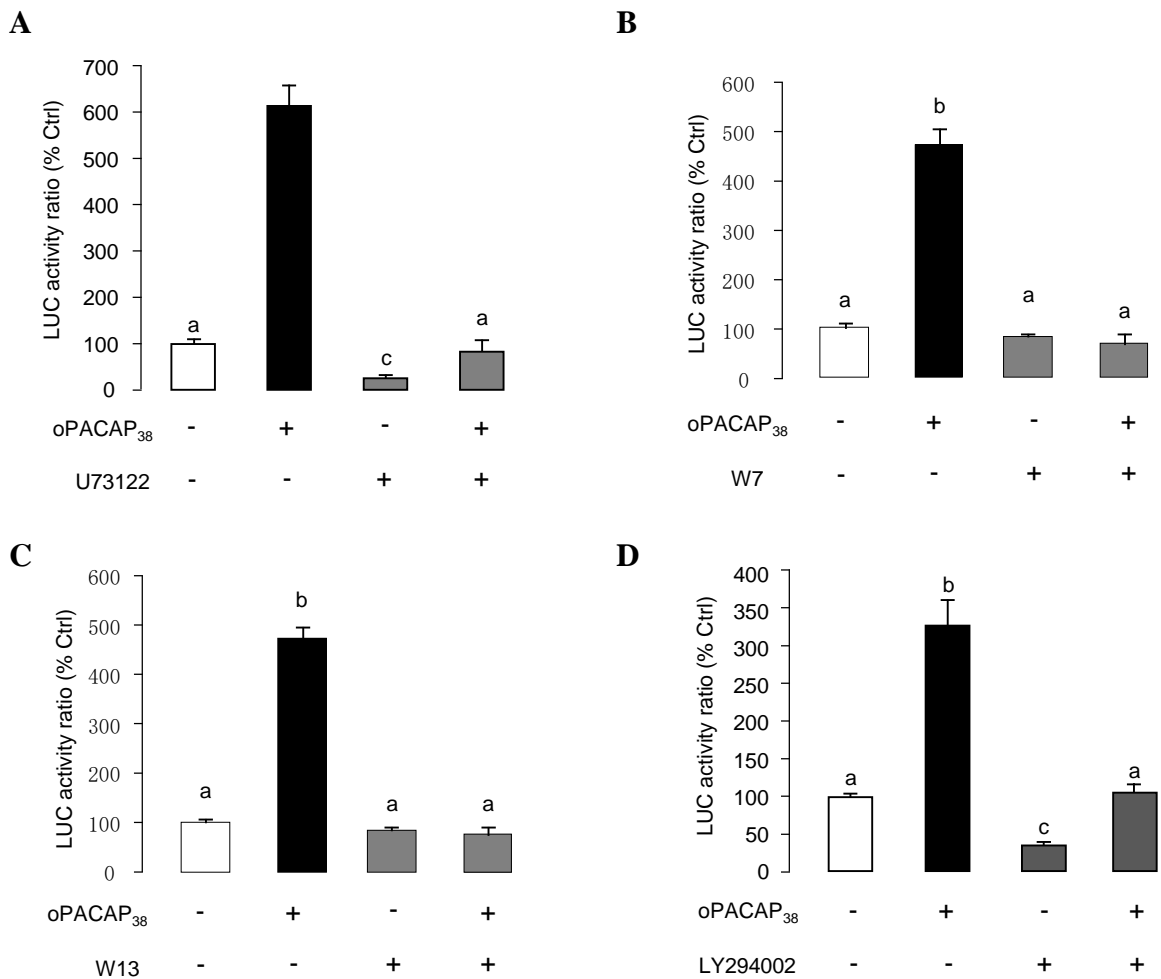

**Supplementary Figure 4. Effect of U73122, LY294002, W7 and W13 on PACAP-induced PRL promoter activity in  $\alpha$ T3-1 Cells.**  $\alpha$ T3-1 Cells were transiently transfected with pPRL(-1156).LUC for 6 h by using lipofectamine. After 18 h recovery, the cells were pre-treated with respective inhibitors for 15mins before co-incubation with oPACAP38 for 24 hours. After drug treatment, cell lysate was prepared for dual-luciferase measurement. (A) Effects of the PLC inhibitor U73122 (10  $\mu$ M) on PACAP (100 nM) stimulated PRL promoter activity. (B&C) Effects of the CaM inhibitor W7 (30  $\mu$ M) and W13 (100  $\mu$ M) on PACAP (100 nM) stimulated PRL promoter activity. (D) Effects of the PI3K inhibitor LY294002 (10  $\mu$ M) on PACAP (100 nM) stimulated PRL promoter activity. Data are presented as percentage of control by converting the ratio of firefly and renilla luciferase in the same sample. The results are expressed as mean  $\pm$  SEM (n = 4) and different letters denote a significant difference at p < 0.05 (ANOVA followed by Fisher's LSD Test).
